# Supplementary material for: Neuropsychological Deficits Chronically Developed after Focal Ischemic Stroke and Beneficial Effects of Pharmacological Hypothermia in the Mouse
Source: PubMed Central journal article supplement (PMC6961763; doi:10.14336/ad.2019.0507), 2020-02-01
Supplement: AD-11-1-1-s.pdf [file AD-11-1-1-s.pdf]

# **Neuropsychological Deficits Chronically Developed after Focal Ischemic Stroke and Beneficial Effects of Pharmacological Hypothermia in the Mouse**

**Weiwei Zhong<sup>1,2</sup>, Yan Yuan<sup>1,3</sup>, Xiaohuan Gu<sup>1,2</sup>, Samuel In-young Kim<sup>1</sup>, Ryan Chin<sup>1</sup>, Modupe Loye<sup>2</sup>, Thomas A Dix<sup>4</sup>, Ling Wei<sup>1</sup>, Shan Ping Yu<sup>1,2\*</sup>**

<sup>1</sup>Department of Anesthesiology, Emory University School of Medicine, Atlanta, GA 30322, USA. <sup>2</sup>Center for Visual and Neurocognitive Rehabilitation, Atlanta Veterans Affairs Medical Center, Decatur, GA 30033, USA. <sup>3</sup>College of Veterinary Medicine, Yangzhou University, Yangzhou, 225009, China. <sup>4</sup>Department of Drug Discovery and Biomedical Sciences, Medical University of South Carolina, Charleston, SC 29401, USA.

## SUPPLEMENTARY DATA

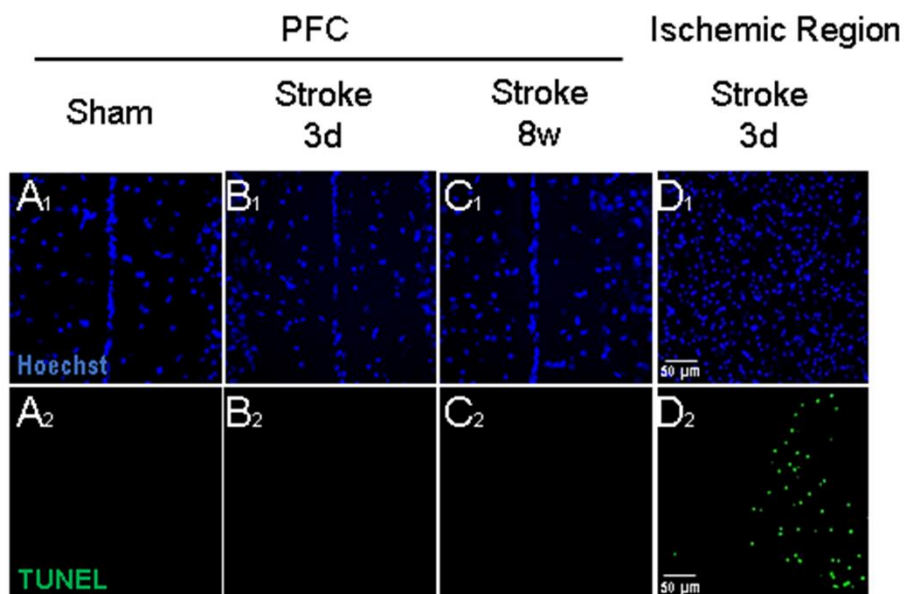

**Supplementary Figure 1. TUNEL staining in the non-ischemic PFC after focal ischemia in the sensorimotor cortex. (A-C)** No TUNEL-positive cells were detected in the PFC of sham and stroke mice. **(D)** TUNEL staining in the ischemic region was tested as positive control and TUNEL-positive cells were detected in the ischemic region at 3 days post stroke.
